# Supplementary material
Source: publisher figshare collection journal article supplement (https://acs.figshare.com/ndownloader/files/3746278)
Supplement: Supplementary file 1 [file 3746278]

Supporting information for

# Leaky Mode Resonance of Polyimide Waveguide Couples Metal Plasmon Resonance for SERS

*Shuai Wang,<sup>1</sup> Zhiyong Wu,<sup>1,2</sup> Lei Chen,<sup>1,2</sup> Yuejiao Gu,<sup>1</sup> Hailong Wang,<sup>1</sup> Shuping Xu,<sup>1\*</sup> Weiqing Xu<sup>1</sup>*

1. State Key Laboratory of Supramolecular Structure and Materials, Institute of Theoretical  
Chemistry, Jilin University, Changchun 130012, P. R. China

2. College of Physics, Jilin University, Changchun 130012, P. R. China

\*Corresponding Author

Address: State Key Laboratory of Supramolecular Structure and Materials, Institute of Theoretical  
Chemistry, Jilin University, 2699 Qianjin Ave. Changchun 130012, P. R. China

Email: xusp@jlu.edu.cn

Tel: 86-431-85168505; Fax: 86-431-85193421

## 1. Preparation of PI films with different thickness.

To accurately control the thickness of the PI film, we changed the concentration of the PI solution (75% and 100%) and keep the spinning speed at a certain rate. Tables S1 and S2 list the thicknesses of PI films with multi layers measured by a probe profiler (Veeco, Dektak 150).

Table S1 The thickness of PI with multi layers of the PI solution of 75%.

| <b>Times of spinning</b> | <b>Value <math>\pm</math> Error (nm)</b> |
|--------------------------|------------------------------------------|
| <b>Once</b>              | $230 \pm 4$                              |
| <b>Twice</b>             | $250 \pm 7$                              |
| <b>Three times</b>       | $260 \pm 9$                              |
| <b>Four times</b>        | $270 \pm 5$                              |

Table S2 The thickness of PI with multi layers of the PI solution of 100%.

| <b>Times of spinning</b> | <b>Value <math>\pm</math> Error (nm)</b> |
|--------------------------|------------------------------------------|
| <b>Once</b>              | $290 \pm 4$                              |
| <b>Twice</b>             | $450 \pm 8$                              |
| <b>Three times</b>       | $580 \pm 7$                              |
| <b>Four times</b>        | $690 \pm 9$                              |

## 2. Measurement of PI refractive index and thickness by ellipsometry.

The original data were obtained by a ellipsometer (Uvisel II , Horiba). By fitting the data through the settings “Range: 1.5000-6.0000 eV, Increment: 0.0500 eV, Points Number: 91”, a five layers structure was established along with the process searching, including air, PI, PI/Ag interface, Ag and glass layers as shown in Scheme S1, in which the PI layer was described by a dispersion formula of New Amorphous (short for “nam”) derived by Horiba Jobin Yvon from Forouhi-Bloomer formulation.

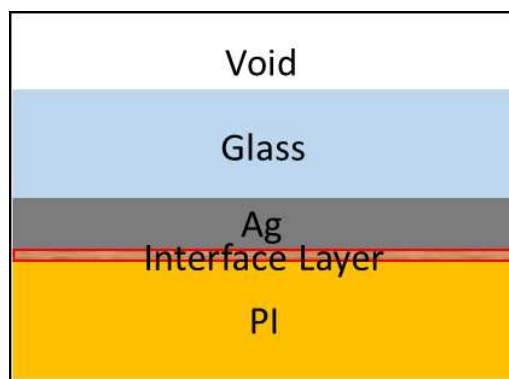

Scheme S1. The optical model for ellipsometric data fitting.

The fitting and result information shown in the following panel is a PI film obtained by spinning coating PI (100%) at a speed of 700 rpm for 10 s and 2000 rpm for 20 s. The resulted Root-Mean-Square of 10.02 within the range of 1.5-5.5 eV exhibits accessible correspondence between measured and fitted data. Additionally, the absolute value of every single number in correlation matrix less than or equal to 0.835 means an excellent independence between every two parameters. The resulted fitting dispersive curve gave an exact value of 1.760 at the wavelength of 532 nm.

Table S3 Parameters of simulated waveguide

| Layers                    | Value $\pm$ Error (nm) |
|---------------------------|------------------------|
| Ag film thickness         | 27.738 $\pm$ 0.986     |
| Interface layer thickness | 11.327 $\pm$ 1.382     |
| PI layer thickness        | 278.656 $\pm$ 3.310    |

Table S4 Correlation matrix calculated between the parameters used for fit.

| =1= | =2=    | =3=    | =4=    | =5=    | =6=    | =7=    | =8=    |
|-----|--------|--------|--------|--------|--------|--------|--------|
| 1   | -0.056 | -0.382 | 0.218  | -0.471 | -0.228 | -0.039 | 0.037  |
|     | 1      | 0.2228 | -0.547 | -0.364 | 0.023  | 0.321  | 0.282  |
|     |        | 1      | -0.821 | -0.267 | -0.274 | 0.500  | 0.104  |
|     |        |        | 1      | 0.638  | 0.337  | -0.835 | -0.239 |
|     |        |        |        | 1      | 0.585  | -0.771 | -0.127 |
|     |        |        |        |        | 1      | -0.507 | 0.694  |
|     |        |        |        |        |        | 1      | 0.093  |
|     |        |        |        |        |        |        | 1      |

Eight parameters listed are Ag film thickness, Interface layer thickness, PI layer thickness,  $n_{\infty}$ ,  $\omega_j$ ,  $f_j$ ,  $\omega_g$  and  $\Gamma_j$  in nam dispersion formula of PI.

### 3. Raman spectrum of PI.

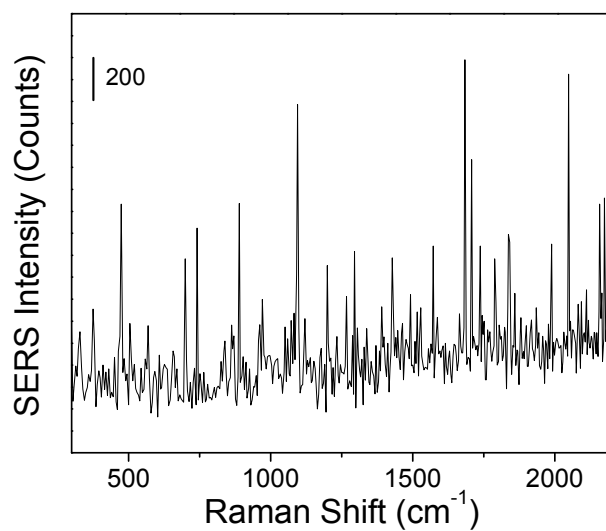

Figure S1 Raman spectrum of PI under the excitation wavelength of 532 nm. The power of the laser was 1.5 mW and the integration time of the CCD was 15 s.

#### 4. The measure of the thickness of a bilayer of PSS/PDDA

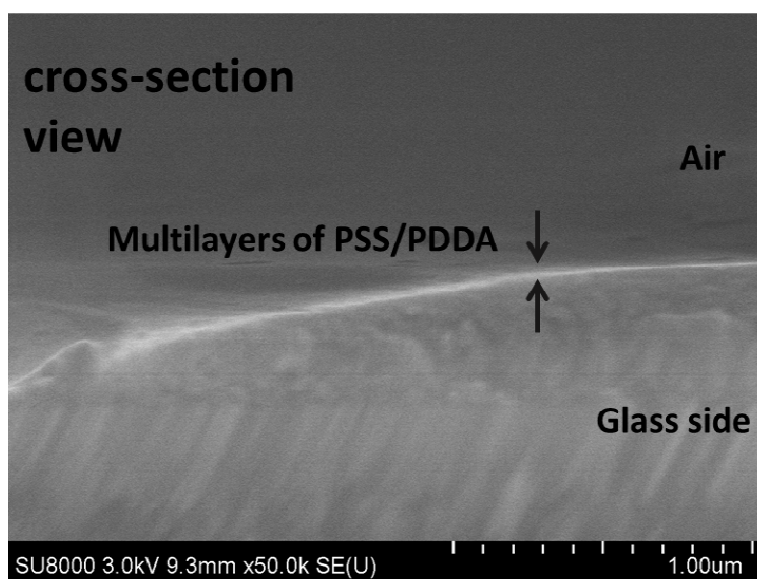

Figure S2 The SEM image of ten bilayers of PSS/PDDA. The total thickness of multilayers is about 21 nm.

## 5. Uv-vis spectrum and TEM image of Ag nanoparticles.

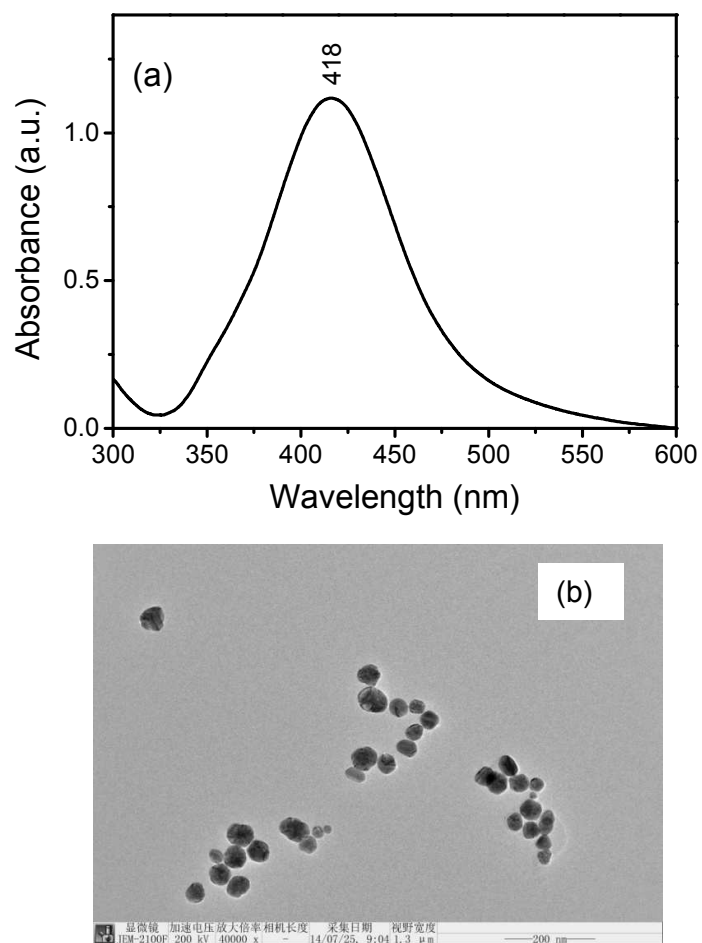

Figure S3 Uv-vis spectrum (a) and the TEM image (b) of the prepared Ag colloid.

**6. The resonance curves of the prism-type SPR excitation at 532 nm.**

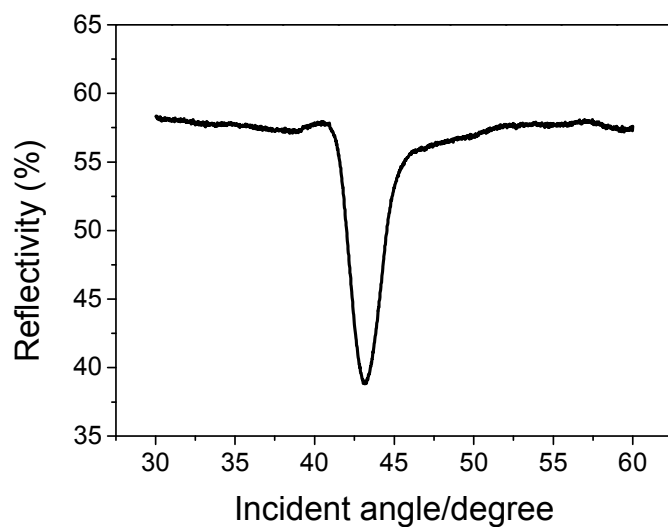

Figure S4 The resonance curves of the prism-type SPR excitation at 532 nm. The thickness of Ag film is 40 nm and the resonance angle is  $43.2^{\circ}$ .



7. Comparison of the excitation modes of TE and TM.

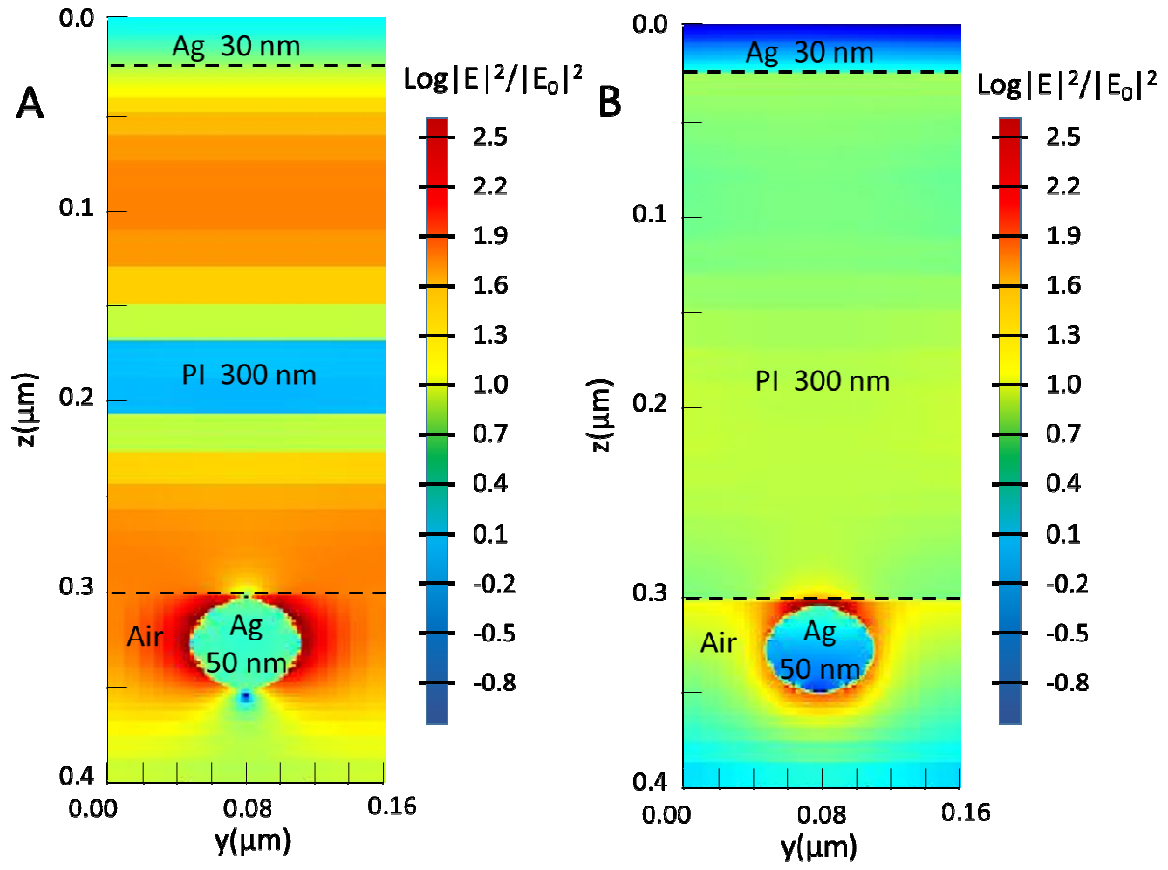

Figure S5 FDTD simulated EM field distributions of an Ag nanoparticle assembled on the PI waveguide (thickness =300 nm) surface in TE1 (A) and TM1 (B) mode with the 532 nm light source. The incident angles for TE1 and TM1 are 49.6° and 41.9°, respectively.

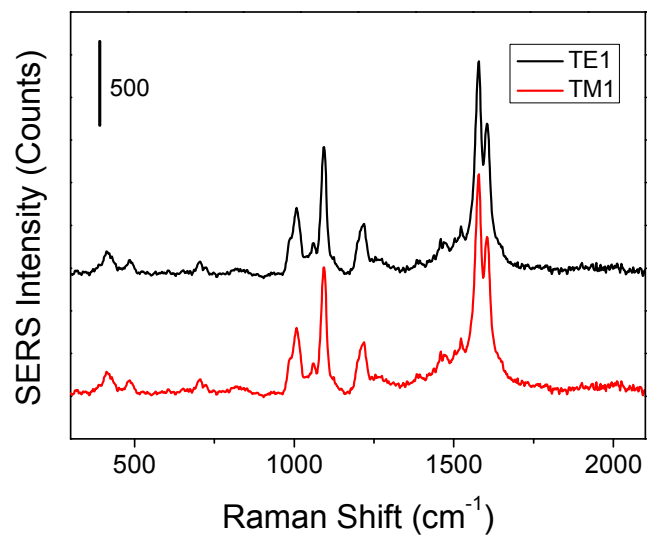

Figure S6 SERS spectra of 4-Mpy ( $1.0 \times 10^{-6}$  M) under the LMR-MPR coupling containing in TE1 mode (black line) and in TM1 mode (red line). The power of the laser was 1.5 mW and the integration time of the CCD was 15 s. The incidence angles for TM1 and TE1 are  $43.5^\circ$  and  $50.4^\circ$ , respectively.
